# Supplementary material for: The global translation profile in a ribosomal protein mutant resembles that of an eIF3 mutant
Source: PubMed Central journal article supplement (PMC3901033; doi:10.1186/1741-7007-11-123), 2013-12-30

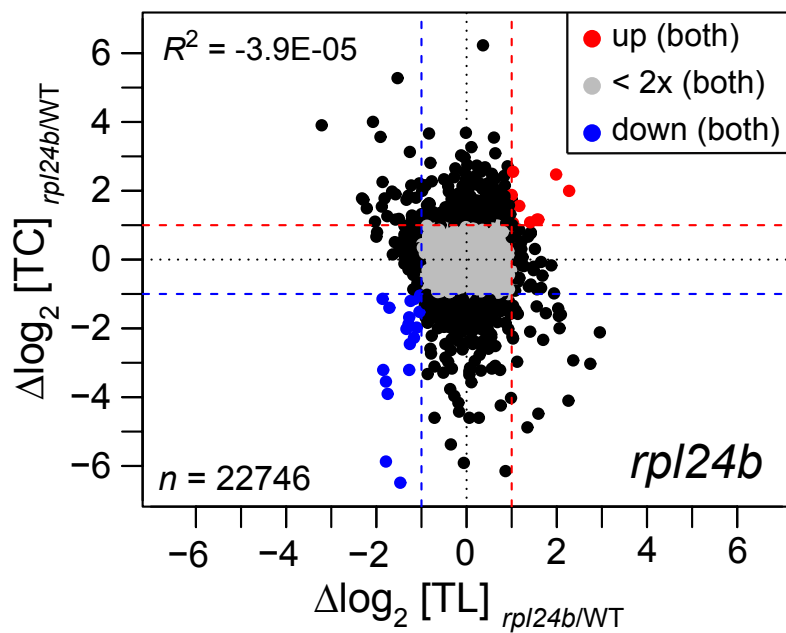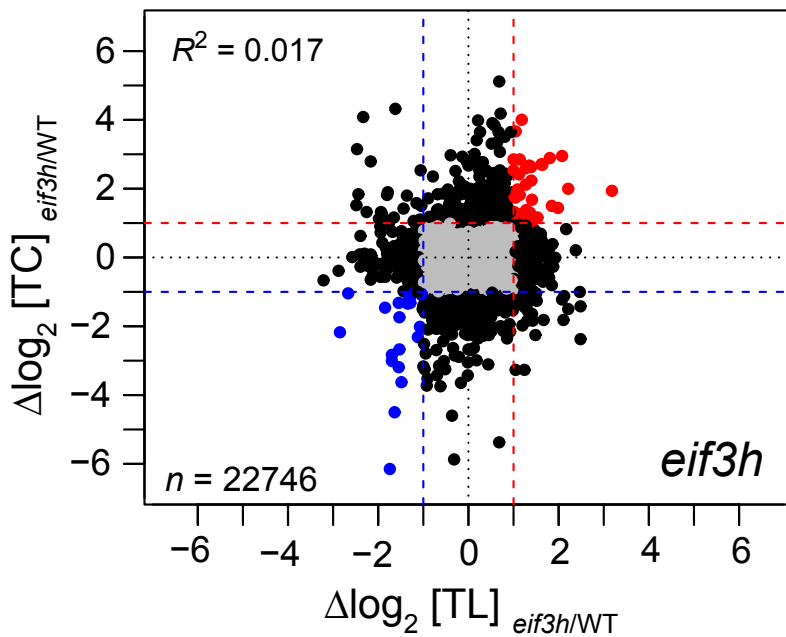

Supplement: 1741-7007-11-123-S2.pdf [file 1741-7007-11-123-S2.pdf]
