# Supplementary material for: The global translation profile in a ribosomal protein mutant resembles that of an eIF3 mutant
Source: PubMed Central journal article supplement (PMC3901033; doi:10.1186/1741-7007-11-123), 2013-12-30
Supplement: 1741-7007-11-123-S3.pdf [file 1741-7007-11-123-S3.pdf]

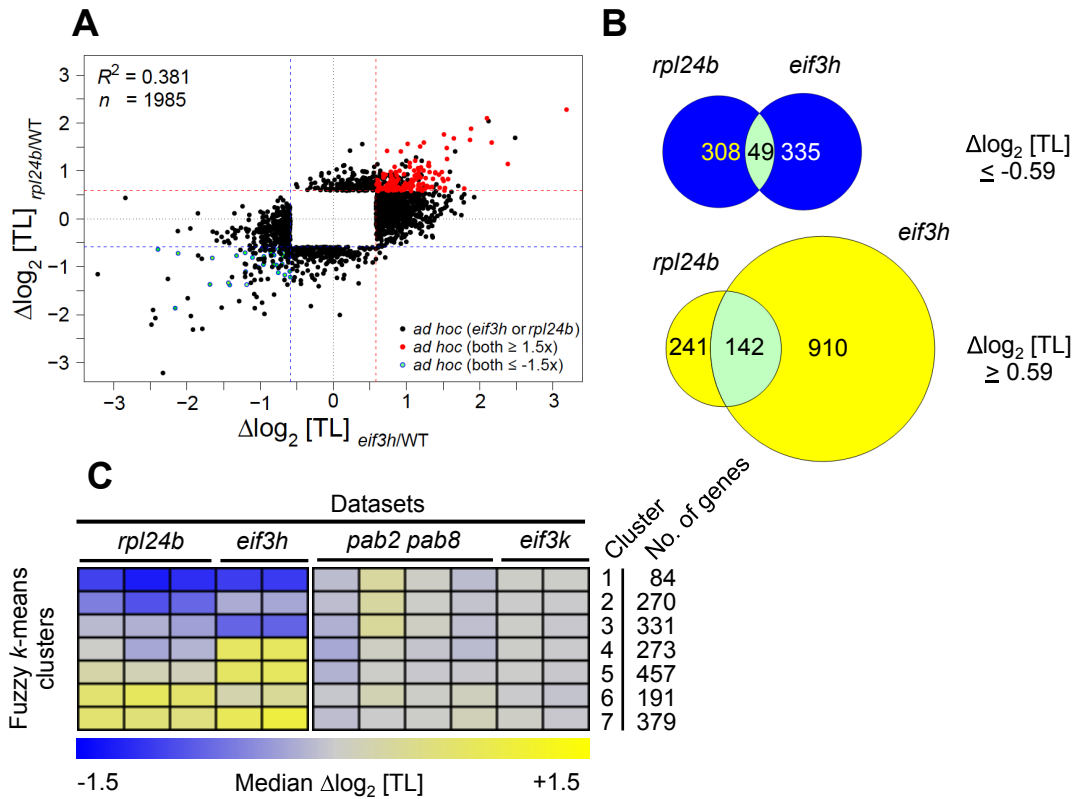

**D**

| Cluster | GO terms                         | Adj. $p$ -values | Enrichment fold |
|---------|----------------------------------|------------------|-----------------|
| 3       | MF: ATP binding                  | 3.98E-07         | 1.8             |
|         | BP: photosynthesis               | 3.41E-03         | 2.7             |
|         | BP: response to abiotic stimulus | 6.87E-03         | 1.4             |
| 4       | CC: chloroplast                  | 2.17E-10         | 1.7             |
|         | CC: vacuole                      | 6.34E-07         | 2.7             |
|         | CC: Golgi apparatus              | 1.05E-03         | 2.0             |
|         | MF: ribosome                     | 4.82E-03         | 2.8             |
|         | BP: response to abiotic stimulus | 2.31E-02         | 1.4             |
| 5       | CC: chloroplast                  | 3.15E-16         | 1.7             |
|         | BP: photosynthesis               | 1.21E-12         | 4.1             |
|         | MF: ribosome                     | 7.60E-09         | 3.5             |
|         | CC: vacuole                      | 2.12E-08         | 2.4             |
|         | CC: Golgi apparatus              | 3.47E-05         | 1.9             |
| 6       | BP: response to abiotic stimulus | 6.78E-04         | 1.4             |
|         | CC: nucleolus                    | 1.30E-10         | 7.0             |
|         | MF: ribosome                     | 3.10E-04         | 3.8             |
|         | CC: chloroplast                  | 5.32E-04         | 1.5             |
| 7       | BP: response to abiotic stimulus | 1.84E-02         | 1.5             |
|         | MF: ribosome                     | 2.12E-68         | 11.8            |
|         | CC: nucleolus                    | 1.97E-21         | 7.1             |
|         | CC: chloroplast                  | 4.09E-18         | 1.9             |
|         | CC: Golgi apparatus              | 2.44E-16         | 3.1             |
| 4-7     | CC: vacuole                      | 8.99E-16         | 3.4             |
|         | BP: response to abiotic stimulus | 1.41E-09         | 1.8             |
|         | MF: ribosome                     |                  | 5.8             |
