# Supplementary material for: The global translation profile in a ribosomal protein mutant resembles that of an eIF3 mutant
Source: PubMed Central journal article supplement (PMC3901033; doi:10.1186/1741-7007-11-123), 2013-12-30
Supplement: 1741-7007-11-123-S6.pdf [file 1741-7007-11-123-S6.pdf]

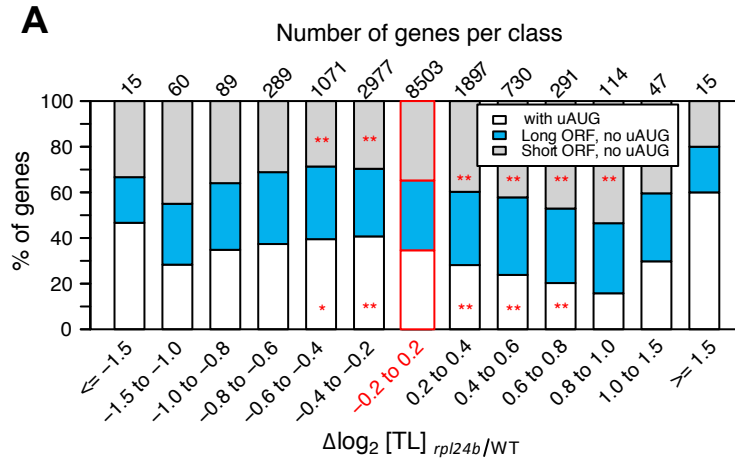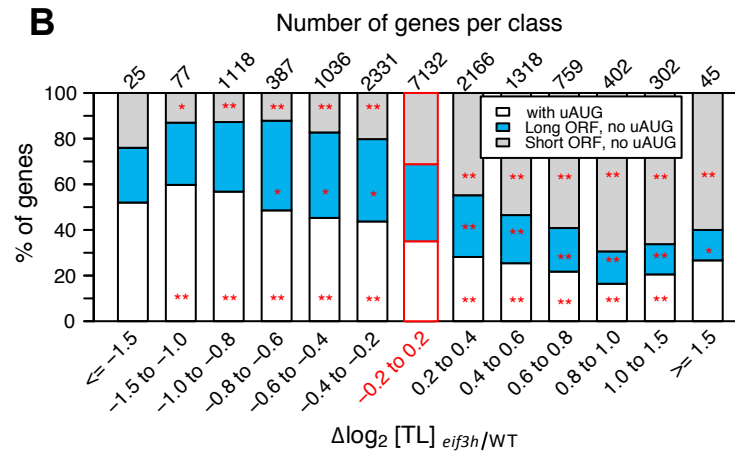

**C**

| $\Delta \text{TL}$ |               | Number of genes |         |           |             |
|--------------------|---------------|-----------------|---------|-----------|-------------|
| <i>eif3h</i>       | <i>rpl24b</i> | Total           | no uORF | with uORF | % with uORF |
| < -1.0             | < -1.0        | 21              | 16      | 5         | 24%         |
| < -1.0             | < -0.6        | 30              | 22      | 8         | 27%         |
| < -1.0             | > -0.6        | 24              | 8       | 16        | 67%         |
